# Supplementary material for: Otx2 is a target of N-myc and acts as a suppressor of sensory development in the mammalian cochlea
Source: Oxford University Press journal article supplement (doi:10.1242/dev.122465), 2015-01-01
Supplement: dev122465supp.pdf [file dev122465supp.pdf]

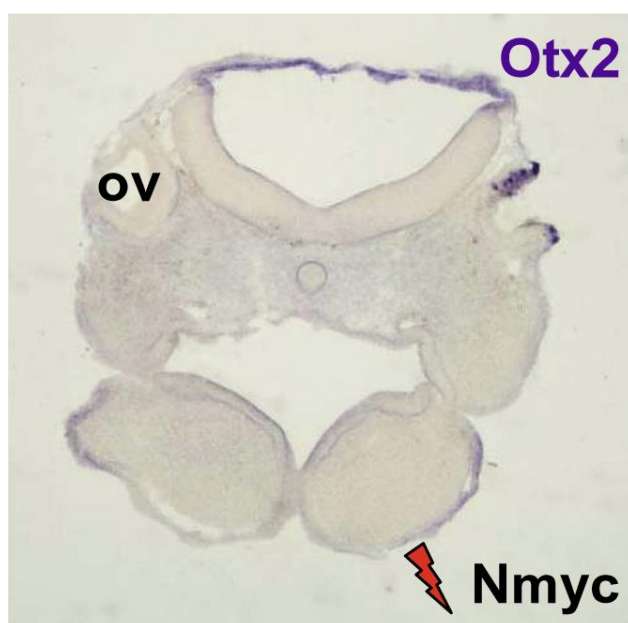

**Supplementary Fig. 1. Misexpression of N-myc leads to ectopic Otx2 expression in the otic vesicle of chicken embryos.**

Transversal section of a chicken embryo upon electroporation of the otic vesicle (ov) with vectors containing N-myc and GFP. Ectopic cOtx2 expression is detected in the dorsal portion of the electroporated otic vesicle (right) after a brief exposure to the chromogenic substrate, indicating the presence of the digoxigenin-labelled RNA probe.

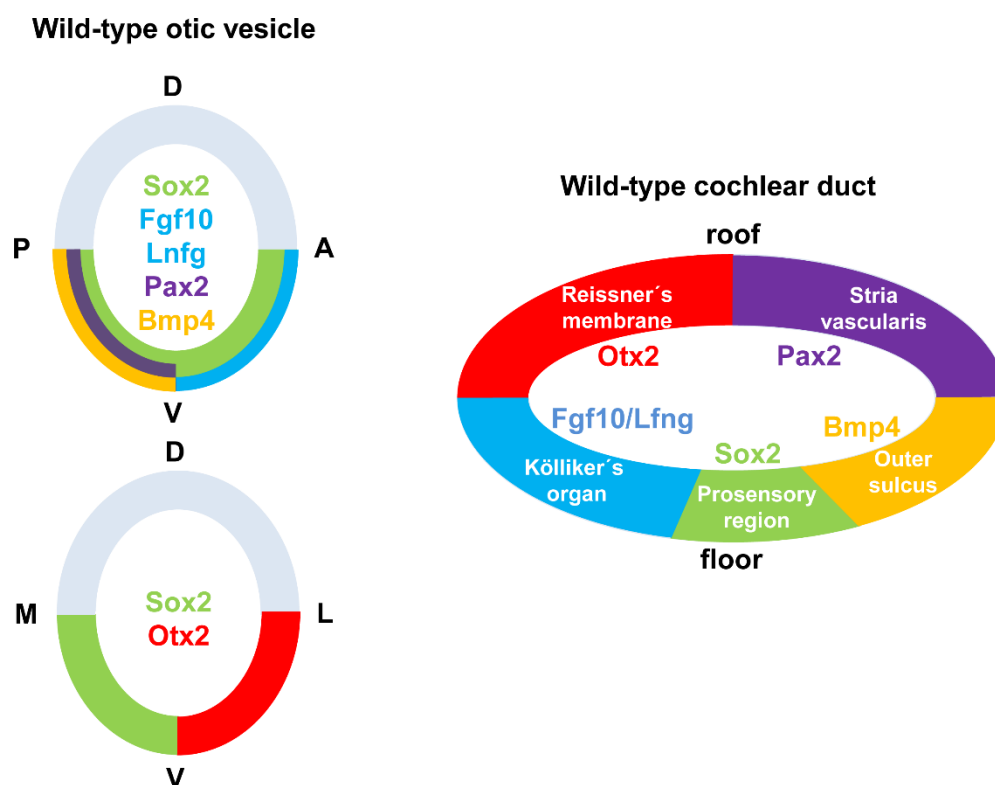

**Supplementary Fig. 2. Expression domains of genes involved in otic patterning in the otic vesicle and the cochlear duct.**

Sox2 is initially broadly expressed throughout the ventral portion of the otic vesicle (top, left) but is then downregulated in the ventro-lateral domain at the level where Otx2 expression is now found (bottom, left). Results from the present work and previous publications (Burton et al., 2004; Kiernan et al., 2005; Mak et al., 2009; Morsli et al., 1998; Morsli et al., 1999; Ohyama et al., 2012; Pauley et al., 2003) indicate that the future cochlear duct may be mapped onto the ventral portion of the otic vesicle. A molecular map of otic patterning genes in the cochlear duct is shown on the right. The expression of these patterning genes in the ventro-medial (Sox2) and ventro-lateral (Otx2) (bottom, left), and antero-ventral (Lfng, Fgf10) and postero-ventral domains (Pax2, Bmp4) (top, left) of the otic vesicle are indicated. Note that in the case of Pax2 and Bmp4 only the postero-ventral domains of expression which are likely to be relevant for the formation of the cochlear duct are shown. Abbreviations: a, anterior; d, dorsal; l, lateral; m, medial; p, posterior; v, ventral.

**Table S1. Summary of genes downregulated in the cochlea of *N-myc* mutants**

| <b>Gene (MGI reference)</b>                                | <b>Fold Downregulation</b> | <b>Expression Pattern</b>                |
|------------------------------------------------------------|----------------------------|------------------------------------------|
| low density lipoprotein receptor-related protein 2 (95794) | 6.8 x                      | roof of cochlear duct                    |
| endothelin converting enzyme-like 1 (1343461)              | 5.3 x                      | roof of cochlear duct                    |
| solute carrier family 6, member 15 (2143484)               | 4.7 x                      | cochlear ganglion                        |
| calbindin 1 (88248)                                        | 4.6 x                      | cochlear ganglion                        |
| orthodenticle homolog 2 (MGI:97451)                        | 4.4 x                      | roof of cochlear duct                    |
| otoancorin (2149209)                                       | 3.2 x                      | roof of cochlear duct                    |
| protein kinase C, theta (97601)                            | 3.0 x                      | cochlear duct                            |
| mucolipin 3 (1890500)                                      | 2.7 x                      | cochlear duct                            |
| solute carrier family 27, member 2 (1347099)               | 2.6 x                      | roof of cochlear duct                    |
| EF hand domain containing 1 (1921607)                      | 2.6 x                      | neural portion of cochlear duct          |
| family with sequence similarity 20, member A (2388266)     | 2,5 x                      | cochlea                                  |
| hepatocyte growth factor (96079)                           | 2.3 x                      | roof of cochlear duct                    |
| ectonucleoside triphosphate diphosphohydrolase 3 (1321386) | 2.3 x                      | roof of cochlear duct, cochlear ganglion |

|                                                                         |       |                                       |
|-------------------------------------------------------------------------|-------|---------------------------------------|
| arginase type II (1330806)                                              | 2.2 x | cochlear duct                         |
| Ca <sup>2+</sup> -dependent activator protein for secretion 2 (2443963) | 2.2 x | roof of cochlear duct                 |
| tubulin, beta 4 (107848)                                                | 2.2 x | cochlear ganglion                     |
| TOX high mobility group box family member 3 (3039593)                   | 2.1 x | cochlear duct                         |
| major facilitator superfamily domain containing 2A (1923824)            | 2.1 x | neural portion of cochlear duct       |
| adaptor protein complex AP-1, mu 2 subunit (1336974)                    | 2.1 x | cochlear duct                         |
| upstream transcription factor 1 (99542)                                 | 2.0 x | cochlear ganglion                     |
| family with sequence similarity 107, member A (3041256)                 | 2.0 x | neural portion of cochlear duct       |
| myosin VB (106598)                                                      | 2.0 x | cochlear ganglion                     |
| chloride channel Ka (1329026)                                           | 2.0 x | roof of cochlear duct                 |
| claudin 9 (1913100)                                                     | 2.0 x | cochlear duct                         |
| glutamyl aminopeptidase (106645)                                        | 2.0 x | cochlear duct                         |
| G protein-coupled receptor 56 (1340051)                                 | 2.0 x | cochlear ganglion                     |
| RIKEN cDNA 1190002H23 gene (1913464)                                    | 2.0 x | neural portion of cochlear duct       |
| tumor necrosis factor receptor superfamily, member (1352474)            | 2.0 x | cochlear duct, surrounding mesenchyme |
| melanoregulin (2151839)                                                 | 2.0 x | cochlear ganglion                     |

The localization of the genes within the cochlea was predicted according to Diez-Roux et al. (2011) who show expression of the listed genes at E14.5 using RNA in situ hybridization. The table shows a list of genes which are expressed in the cochlea and downregulated by twofold or higher in *N-myc* mutant cochleas according to the results obtained by the microarrays.
